## Short Communication

### Optimizing the Accuracy of Cortical Volumetric Analysis in Traumatic Brain Injury

Bram R. Diamond,<sup>1,2</sup> Christine L. Mac Donald,<sup>3</sup> Samuel B. Snider,<sup>1</sup>  
Bruce Fischl,<sup>2</sup> Kristen Dams-O'Connor,<sup>4,5</sup> \* Brian L. Edlow<sup>1,2</sup> \*

\* co-senior authors

<sup>1</sup>Center for Neurotechnology and Neurorecovery, Department of Neurology, Massachusetts General Hospital and Harvard Medical School, Boston, MA.

<sup>2</sup>Athinoula A. Martinos Center for Biomedical Imaging, Department of Radiology, Massachusetts General Hospital and Harvard Medical School, Charlestown, MA.

<sup>3</sup>Department of Neurological Surgery, University of Washington, Seattle, WA.

<sup>4</sup>Department of Rehabilitation Medicine, Icahn School of Medicine at Mount Sinai, New York, NY.

<sup>5</sup>Department of Neurology, Icahn School of Medicine at Mount Sinai, New York, NY.

Correspondence to:

Kristen Dams-O'Connor, Ph.D.

Email: [kristen.dams-o'connor@mountsinai.org](mailto:kristen.dams-o'connor@mountsinai.org)

Word Count: 2,039

Figures: 2

Supplementary Material: Supplementary Methods, 2 Supplementary Figures, 4 Supplementary Tables, 3 Videos

**Keywords** : traumatic brain injury, contusion, MRI, FreeSurfer, neurodegeneration

29 **Author Contact Information**

30

31 Bram R. Diamond: [brdiamond@mgh.harvard.edu](mailto:brdiamond@mgh.harvard.edu), Phone (617) 726-4050, Fax: (617) 726-7422, address:  
32 Athinoula A. Martinos Center for Biomedical Imaging, 149 Thirteenth Street, Charlestown, MA 02129.

33

34 Christine L. Mac Donald: [cmacd@uw.edu](mailto:cmacd@uw.edu), Phone: (206) 897-4047, Fax: (206) 744-9942, address:  
35 University of Washington School of Medicine, Department of Neurological Surgery, 325 9<sup>th</sup> Ave, Box  
36 359924, Seattle, WA 98104.

37

38 Samuel B. Snider: [ssnider@partners.org](mailto:ssnider@partners.org), Phone: (617) 724-6352, Fax: (617) 643-3939, address:  
39 Massachusetts General Hospital, 175 Cambridge St – Suite 300, Boston, MA 02114.

40

41 Bruce Fischl: [fischl@nmr.mgh.harvard.edu](mailto:fischl@nmr.mgh.harvard.edu), Phone: (617) 726-3197, Fax: (617) 726 -7422, address:  
42 Athinoula A. Martinos Center for Biomedical Imaging, 149 13<sup>th</sup> Street, Charlestown, MA 02129.

43

44 Kristen Dams-O'Connor: [kristen.dams-o'connor@mountsinai.org](mailto:kristen.dams-o'connor@mountsinai.org), Phone: (212) 241-7587, Fax: (212)  
45 241-0137, address: Brain Injury Research Center, Department of Rehabilitation Medicine, Department of  
46 Neurology, Box 1163, One Gustave L. Levy Place, New York, NY 10029.

47

48 Brian L. Edlow: [bedlow@mgh.harvard.edu](mailto:bedlow@mgh.harvard.edu), Phone: (617) 724-6352, Fax: (617) 643-3939, address:  
49 Massachusetts General Hospital, 175 Cambridge St – Suite 300, Boston, MA 02114.

50 **Abstract**

51 Cortical volumetric analysis is widely used to study the anatomic basis of neurological deficits in  
52 patients with traumatic brain injury (TBI). However, patients with TBI-related lesions are often  
53 excluded from analysis, because cortical lesions may compromise the accuracy of reconstructed  
54 surfaces upon which volumetric measurements are based. Here, we propose a novel FreeSurfer-  
55 based lesion correction method and illustrate its impact on cortical volume measures in patients  
56 with chronic moderate-to-severe TBI. We performed MRI in 87 patients at mean $\pm$ -SD 10.9 $\pm$ -  
57 9.1 years post-injury using a T1-weighted multi-echo MPRAGE sequence at 1 mm resolution.  
58 Following surface reconstruction, we parcellated the cerebral cortex into seven functional  
59 networks using FreeSurfer's standard pipeline. Next, we manually labeled vertices on the cortical  
60 surface where lesions caused inaccuracies and removed them from network-based cortical  
61 volumetric measures. After performing this lesion correction procedure, we measured the surface  
62 area of lesion overlap with each network and the percent volume of each network affected by  
63 lesions. We identified 120 lesions that caused inaccuracies in the cortical surface in 46 patients.  
64 In these 46 patients, the most commonly lesioned networks were the limbic and default mode  
65 networks (95.7% each), followed by the executive control (78.3%), and salience (71.7%)  
66 networks. The limbic network had the largest average surface area of lesion overlap (4.4 $\pm$ -3.7%)  
67 and the largest percent volume affected by lesions (12.7 $\pm$ -9.7%). The lesion correction method  
68 has the potential to improve the accuracy of cortical volumetric measurements and permit  
69 inclusion of patients with lesioned brains in quantitative analyses, providing new opportunities to  
70 elucidate network-based mechanisms of neurological deficits in patients with TBI.

## 71 **Introduction**

72           Cortical volumetric analysis with FreeSurfer<sup>1, 2</sup> is widely used to study the neuroanatomic  
73 basis of cognitive, behavioral, and motor deficits in patients with traumatic brain injury (TBI).<sup>3-6</sup>  
74 However, cortical lesions caused by TBI pose major challenges to FreeSurfer's standard  
75 automated magnetic resonance imaging (MRI) processing pipeline. Lesions often compromise  
76 the accuracy of the cortical surfaces that are reconstructed and used by FreeSurfer to generate  
77 volumetric measurements.<sup>4, 6, 7</sup> As a result, TBI imaging studies have historically excluded  
78 patients with large focal lesions.<sup>5, 8</sup> Development of a tool that accounts for lesions in cortical  
79 volumetric analysis is needed to prevent the systematic exclusion of patients with large cortical  
80 lesions and to ensure that TBI imaging studies are generalizable across the full spectrum of  
81 cortical pathology. Moreover, integration of such a tool into the FreeSurfer software platform  
82 would create new opportunities to study network-based mechanisms of disease<sup>9, 10</sup> using  
83 canonical atlases.<sup>11</sup>

84           Here, we propose a novel FreeSurfer-based lesion correction method and illustrate its  
85 impact on cortical volumetric measures in patients with chronic TBI. The lesion correction  
86 method differs in several ways from the standard FreeSurfer approach to editing reconstructed  
87 cortical surfaces. Standard cortical segmentation using FreeSurfer relies on the assumption that  
88 the brain has normal anatomy and that any surface inaccuracies are related to the FreeSurfer  
89 processing pipeline. However, in patients with cortical lesions caused by TBI, FreeSurfer's  
90 reconstruction of the cortical surface can be grossly inaccurate due to focal encephalomalacia  
91 and distorted anatomy. This methodological limitation of the standard FreeSurfer editing  
92 approach is the main motivation for the lesion correction method proposed here. The new

93 method makes no assumptions about lesioned cortical surface anatomy, and it minimizes bias by  
94 requiring the manual rater simply to identify inaccuracies without changing the surfaces. In this  
95 study, we use the lesion correction method to assess the topology of lesion overlap with  
96 functional brain networks and to characterize inter-network differences in lesion burden. We  
97 also distribute the lesion correction method to the academic community to facilitate future  
98 studies of network-based mechanisms of neurological deficits in patients with TBI.

99

## 100 **Methods**

### 101 *Patients*

102 Between May, 2014 and January, 2019, we prospectively enrolled 141 patients with a history of  
103 TBI at two academic medical centers as part of the Late Effects of TBI (LETBI) study.<sup>12</sup> Patients  
104 were included if they had sustained a moderate-to-severe TBI at least one year prior to  
105 enrollment. We characterized TBI severity based on the United States Department of Defense  
106 classification system,<sup>13</sup> as detailed in the Supplementary Material. Of the 141 enrolled  
107 participants, 98 completed an MRI scan (see CONSORT diagram in Supplementary Fig. S1).

108

### 109 *MRI data acquisition*

110 Patients at Mount Sinai were scanned using a Siemens Skyra (Siemens Medical Solutions,  
111 Erlangen, Germany) 3 Tesla (T) MRI scanner with a 32-channel head coil for signal reception,  
112 and patients at University of Washington were scanned using a Philips Achieva 3T MRI scanner  
113 with a 32-channel head coil.<sup>1</sup> Patients underwent standardized MRI using a T1-weighted multi-  
114 echo MPRAGE (MEMPRAGE)<sup>14</sup> sequence with 1mm isotropic voxels. All LETBI sequences

115 were designed to maximize consistency with the National Institutes of Health Common Data  
116 Elements for TBI Neuroimaging.<sup>15</sup>

117

### 118 *MRI processing*

119 We first processed all MEMPRAGE data using the standard FreeSurfer pipeline (version 6.0) for  
120 cortical surface reconstruction and cortical volume estimation.<sup>1</sup> We used the “big ventricles”  
121 function to optimize automatic segmentation for a patient population with enlarged ventricles. In  
122 accordance with FreeSurfer recommended best practices

123 (<https://surfer.nmr.mgh.harvard.edu/fswiki/FsTutorial/TroubleshootingDataV6.0>), we visually  
124 inspected output files, made manual edits to the white matter segmentation, and added control  
125 points. To ensure that the lesion correction method would be tested in an unbiased manner, we  
126 did not manually edit regions bordering cortical lesions. We then resampled the Yeo 7-Network  
127 resting-state functional connectivity atlas<sup>11</sup> onto each patient’s reconstructed cortical surface  
128 using FreeSurfer’s surface-based registration tool

129 ([https://surfer.nmr.mgh.harvard.edu/fswiki/mri\\_surf2surf](https://surfer.nmr.mgh.harvard.edu/fswiki/mri_surf2surf)).<sup>16</sup>

130

### 131 *Quality Assessments*

132 We performed visual quality assessment for all 98 scans based upon delineation of grey-white  
133 matter boundaries and the accuracy of the FreeSurfer-generated surfaces. We defined scan  
134 quality using an integer scale: 0 = scan excluded because FreeSurfer failed to complete the  
135 processing pipeline; 1 = scan excluded because surface inaccuracies would have required major  
136 manual edits; 2 = scan included because only minor manual edits required; 3 = scan included

137 without requiring manual edits. For any scan that received a score of 1 by the primary rater  
138 (B.R.D.), a second rater (B.L.E.) reviewed the scan to achieve consensus. Our primary method  
139 for determining scan inclusion was qualitative visual assessment because inaccurate FreeSurfer-  
140 based segmentations can confound quantitative measurements. Nevertheless, we performed  
141 quantitative assessments of signal-to-noise ratio (SNR) and contrast-to-noise ratio (CNR) and  
142 tested for correlations with visual assessments of scan quality, as detailed in the Supplementary  
143 Materials.

144

#### 145 *Lesion identification and classification*

146 We next assessed each MRI scan for focal lesions causing encephalomalacia of the cerebral  
147 cortex (Fig. 1, top row).<sup>15</sup> All such lesions were considered for subsequent lesion correction  
148 analysis and classified according to the cortical network(s) with which they overlapped. To  
149 ensure robust and reproducible methods for lesion identification, we performed an inter-rater  
150 reliability analysis among three investigators who identified lesions in a randomly selected group  
151 of 20 MRI scans and calculated lesion volumes using the standard ABC/2 method.<sup>17</sup> Two  
152 investigators were board-certified neurologists with fellowship training in Neurocritical Care  
153 (B.L.E. and S.B.S.) and one was a research technician (B.R.D.).

154

#### 155 *Implementation of the lesion correction procedure*

156 A detailed description of the methodological principles of the lesion correction procedure is  
157 provided in the Supplementary Material. To implement the procedure, we visually identified  
158 sites where FreeSurfer's modeled surface mesh erroneously passed through subcortical tissue

159 (Fig. 1, top row). Next, we manually labeled these surface-points to produce lesion-induced  
160 inaccuracy labels (Fig. 1, middle row). Finally, we applied these labels as exclusion masks to  
161 remove affected surface regions and calculate corrected cortical volumes (Fig. 1, bottom row).

162 After performing this lesion correction procedure, we used standard FreeSurfer tools to  
163 measure the average surface area overlap of lesion-induced inaccuracies with each network of  
164 the Yeo 7-Network atlas<sup>11</sup> and the average percent volume change of each network caused by the  
165 lesion correction procedure (Fig. 2). There was no need to correct cortical volume measurements  
166 by total intracranial volume in this study because all network-based measures (i.e. % change in  
167 volume) were calculated at the single-subject level.

168 An overview of the lesion correction procedure is shown in Video 1, and additional  
169 methodological details are provided in the Supplementary Material. We also release all code used  
170 in the lesion correction procedure on [https://github.com/ComaRecoveryLab/Lesion\\_Correction](https://github.com/ComaRecoveryLab/Lesion_Correction).

171

## 172 *Statistical analysis*

173 We used the intraclass correlation coefficient to test interrater reliability for lesion volume  
174 measurements. We report descriptive statistics for the average percent cortical surface area and  
175 the average percent cortical volume affected by lesions for each network.

176

## 177 **Results**

### 178 *Patient demographics and clinical characteristics*

179 Due to the presence of severe anatomic distortions, two of the 98 patients' scans did not complete  
180 FreeSurfer's standard processing pipeline (visual assessment scores=0). Of the remaining 96



181 scans, nine received a visual assessment score of 1 by the two raters and were excluded, yielding  
182 a final sample size of 87 patients. The 87-patient cohort was comprised of 60.9% men, with a  
183 mean +/- SD age of 56.7 +/- 12.0 years. Injury severity was classified as mild (n=3), moderate  
184 (n=42), and severe (n=32); in 10 participants duration of LOC was unknown and records were  
185 not available. The duration from most recent TBI to MRI was 10.9 +/- 9.1 years. Additional  
186 clinical and demographic data, as well as SNR and CNR data, are provided in Supplementary  
187 Tables 1 and 2.

188

### 189 *Interrater Reliability*

190 The intraclass coefficient between the two physician raters across 20 datasets was 0.99 [95%  
191 Confidence Interval 0.98, 0.99]. The intraclass coefficients between the physician raters and the  
192 technician rater for these same datasets were 0.95 [0.91, 0.97] and 0.96 [0.93, 0.98], respectively.  
193 Because sufficient inter-rater reliability was established in this test set (n=20; intraclass  
194 correlation coefficient > 0.9), all subsequent lesion identification was performed by the  
195 technician rater, B.R.D.

196

### 197 *Lesion characteristics and anatomic distribution*

198 Forty-six of the 87 patients had at least one lesion that affected the accuracy of the FreeSurfer-  
199 modeled cortical surface. There were 120 total lesions, with a median of 2 lesions per patient  
200 (range 1 to 10). On average, lesions overlapped with 4.6 +/- 1.6 of the 7 networks. A group-level  
201 lesion topology map demonstrated an orbitofrontal and anterior temporal predominance of the  
202 lesions (Fig. 2, Videos 2 and 3).

203

204 *Network-based cortical surface area measures*

205 The limbic and default mode networks were lesioned in the largest proportion of patients (44/46  
206 scans, 95.7% incidence for both networks), followed by the executive control (78.3%), and  
207 salience (71.7%) networks. This large limbic lesion burden was observed despite the limbic  
208 network having the smallest average surface area of the seven functional networks across all  
209 patients (Supplementary Fig. S2). The largest mean percentage of lesion-network surface area  
210 overlap occurred within the limbic network (4.4 +/- 3.7% of total network surface area;  
211 Supplementary Table 3).

212

213 *Network-based cortical volume measures*

214 When considering networks impacted by the lesion correction method in the 46 patients with  
215 cortical lesions, we observed a median decrease in network-based cortical volume of 3.4%  
216 (range <1.0% to 47.0%). The limbic network had the largest lesion-induced mean +/- SD  
217 percentage decrease in cortical volume (12.7 +/- 9.7%; Supplementary Table 4).

218

219 **Discussion**

220 We introduce a new FreeSurfer-based method for cortical volumetric analysis in patients with  
221 lesions caused by TBI. We apply this method in a cohort of 87 patients with chronic moderate-to-  
222 severe TBI and show that lesion-induced cortical inaccuracies are not equally distributed within  
223 the brain's functional networks. Rather, inaccuracies preferentially affected the limbic network,  
224 an observation consistent with prior pathology<sup>18,19</sup> and MRI<sup>20</sup> studies showing that traumatic

225 contusions commonly affect the orbitofrontal and temporal nodes of the limbic network.  
226 Implementation of the proposed lesion correction method will prevent the systematic exclusion  
227 of patients with cortical lesions from MRI volumetric studies and improve the generalizability of  
228 MRI studies across the full spectrum of cortical pathology.

229         These findings demonstrate the potential utility of the new lesion correction method for  
230 studying network-based mechanisms of cognitive, behavioral, and motor deficits in patients with  
231 TBI. For example, lesion-induced cortical volume changes within the limbic, default mode, and  
232 frontoparietal networks (the three most frequently lesioned networks) can be tested for  
233 correlations with symptoms that are putatively attributable to their dysfunction, such as  
234 behavioral dysregulation, altered self-awareness, and executive dysfunction, respectively. From a  
235 phenomenological standpoint, the application of the new lesion correction tool to large clinical-  
236 radiological-pathological databases being acquired by the LETBI,<sup>12</sup> Transforming Research and  
237 Clinical Knowledge in TBI (TRACK-TBI),<sup>21</sup> Collaborative European NeuroTrauma  
238 Effectiveness Research in Traumatic Brain Injury (CENTER-TBI),<sup>22</sup> and other studies, has  
239 potential to elucidate pathological signatures of TBI phenotypic classification, with implications  
240 for clinical trial selection<sup>23</sup> and prognostication.<sup>10</sup>

241         Several limitations should be considered when interpreting the results of this study. The  
242 lesion correction method relies upon an assumption whose validity is difficult to test: we assume  
243 that at sites of tissue distortion and encephalomalacia, the cortex is non-functional and therefore  
244 should be masked, or removed, from subsequent cortical volume measurements. This assumption  
245 is made with the recognition that definitive determination of the functional status of lesioned  
246 cortex is not possible solely with T1-weighted MEMPRAGE data. Nevertheless, the assumption

247 that lesioned cortex is non-functional in the population studied here is strongly supported by  
248 visual inspection of the data, which reveals complete or near complete absence of cerebral  
249 cortex, as shown in Figure 1. In future multimodal experiments, the lesion correction method can  
250 be refined by analyzing the functional properties of lesioned cortex (e.g. with functional MRI or  
251 EEG). In future work, it may also be possible to integrate the lesion correction method with  
252 software programs that offer automated lesion detection, such as the ABC module extension of  
253 3D Slicer.<sup>24</sup> Moreover, the method can be used to measure point-wise and region-wise estimates  
254 of cortical thickness in unlesioned cortex by masking inaccurate regions of cortex.

255

## 256 **Conclusions**

257 We demonstrate the impact of a new FreeSurfer-based lesion correction tool on cortical  
258 volumetric measures in 7 atlas-based functional networks, and we distribute this lesion  
259 correction tool to the academic community. We show that cortical lesions are not evenly  
260 distributed across networks, but rather preferentially affect the frontotemporal nodes of the  
261 limbic network. This lesion correction method can facilitate inclusive, unbiased investigation  
262 into the anatomic basis of neurological deficits in patients with TBI and other neuropsychiatric  
263 diseases associated with focal lesions.

264 **Acknowledgments**

265 We thank Cheuk Y. Tang, Ph.D. for assistance with acquisition of MRI data. The LETBI Project  
266 is supported by the National Institutes of Health/ National Institute for Neurological Disorders  
267 and Stroke and National Institute of Child Health and Development (U01 NS086625 and  
268 RF1NS115268). This research was also supported by the NIH Director's Office  
269 (DP2HD101400), National Center for Research Resources (U24RR021382), the National  
270 Institute for Biomedical Imaging and Bioengineering (P41EB015896, R01EB006758,  
271 R21EB018907, R01EB019956, R01EB023281), the National Institute on Aging (AG022381,  
272 R01AG008122, R01AG016495, R01AG008122, U01AG006781, R21AG046657,  
273 P41RR014075, P50AG005136), the National Center for Alternative Medicine (RC1 AT005728-  
274 01), the National Institute for Neurological Disorders and Stroke (K23NS094538,  
275 R21NS109627, R01NS052585, 1R21NS072652, 1R01NS070963, R01NS083534,  
276 5U01NS086625), the Eunice Kennedy Shriver National Institute of Child Health and Human  
277 Development (K01HD074651, R01HD071664), and the National Institute on Disability  
278 Independent Living and Rehabilitation Research (H133B040033). This research also utilized  
279 resources provided by National Institutes of Health shared instrumentation grants S10RR023401,  
280 S10RR019307, and S10RR023043. Additional support for this project comes from the James S.  
281 McDonnell Foundation, the Nancy and Buster Alvord Endowment, the Rappaport Foundation,  
282 the Tiny Blue Dot Foundation, institutional funds from the University of Washington School of  
283 Medicine, and the Seton Brain Research Fund.

284

285

286 **Author Disclosure Statement**

287 None of the authors has a conflicting financial interest. Dr. Fischl has financial interest in  
288 CorticoMetrics, a company whose medical pursuits focus on brain imaging and measurement  
289 technologies. His interests were reviewed and are managed by Massachusetts General Hospital  
290 and Partners HealthCare in accordance with their conflict of interest policies.

291

292

293 **References**

- 294 1. Fischl, B., van der Kouwe, A., Destrieux, C., Halgren, E., Segonne, F., Salat, D.H., Busa, E.,  
295 Seidman, L.J., Goldstein, J., Kennedy, D., Caviness, V., Makris, N., Rosen, B. and Dale, A.M.  
296 (2004). Automatically parcellating the human cerebral cortex. *Cereb Cortex* 14, 11-22.
- 297 2. Fischl, B. and Dale, A.M. (2000). Measuring the thickness of the human cerebral cortex from  
298 magnetic resonance images. *Proc Natl Acad Sci U S A* 97, 11050-11055.
- 299 3. Warner, M.A., Marquez de la Plata, C., Spence, J., Wang, J.Y., Harper, C., Moore, C., Devous,  
300 M. and Diaz-Arrastia, R. (2010). Assessing spatial relationships between axonal integrity,  
301 regional brain volumes, and neuropsychological outcomes after traumatic axonal injury. *J*  
302 *Neurotrauma* 27, 2121-2130.
- 303 4. Santhanam, P., Wilson, S.H., Oakes, T.R. and Weaver, L.K. (2019). Accelerated age-related  
304 cortical thinning in mild traumatic brain injury. *Brain and behavior* 9, e01161.
- 305 5. Warner, M.A., Youn, T.S., Davis, T., Chandra, A., Marquez de la Plata, C., Moore, C., Harper,  
306 C., Madden, C.J., Spence, J., McColl, R., Devous, M., King, R.D. and Diaz-Arrastia, R. (2010).  
307 Regionally selective atrophy after traumatic axonal injury. *Arch Neurol* 67, 1336-1344.
- 308 6. Merkley, T.L., Bigler, E.D., Wilde, E.A., McCauley, S.R., Hunter, J.V. and Levin, H.S. (2008).  
309 Diffuse changes in cortical thickness in pediatric moderate-to-severe traumatic brain injury. *J*  
310 *Neurotrauma* 25, 1343-1345.
- 311 7. Strangman, G.E., O'Neil-Pirozzi, T.M., Supelana, C., Goldstein, R., Katz, D.I. and Glenn,  
312 M.B. (2010). Regional brain morphometry predicts memory rehabilitation outcome after  
313 traumatic brain injury. *Frontiers in human neuroscience* 4, 182.

- 314 8. Ding, K., Marquez de la Plata, C., Wang, J.Y., Mumphrey, M., Moore, C., Harper, C., Madden,  
315 C.J., McColl, R., Whitemore, A., Devous, M.D. and Diaz-Arrastia, R. (2008). Cerebral atrophy  
316 after traumatic white matter injury: correlation with acute neuroimaging and outcome. *J*  
317 *Neurotrauma* 25, 1433-1440.
- 318 9. Fox, M.D. (2018). Mapping Symptoms to Brain Networks with the Human Connectome. *N*  
319 *Engl J Med* 379, 2237-2245.
- 320 10. Sharp, D.J., Scott, G. and Leech, R. (2014). Network dysfunction after traumatic brain injury.  
321 *Nature reviews. Neurology* 10, 156-166.
- 322 11. Yeo, B.T., Krienen, F.M., Sepulcre, J., Sabuncu, M.R., Lashkari, D., Hollinshead, M.,  
323 Roffman, J.L., Smoller, J.W., Zollei, L., Polimeni, J.R., Fischl, B., Liu, H. and Buckner, R.L.  
324 (2011). The organization of the human cerebral cortex estimated by intrinsic functional  
325 connectivity. *Journal of neurophysiology* 106, 1125-1165.
- 326 12. Edlow, B.L., Keene, C.D., Perl, D.P., Iacono, D., Folkerth, R.D., Stewart, W., Mac Donald,  
327 C.L., Augustinack, J., Diaz-Arrastia, R., Estrada, C., Flannery, E., Gordon, W.A.,  
328 Grabowski, T.J., Hansen, K., Hoffman, J., Kroenke, C., Larson, E.B., Lee, P., Mareyam, A.,  
329 McNab, J.A., McPhee, J., Moreau, A.L., Renz, A., Richmire, K., Stevens, A., Tang, C.Y., Tirrell,  
330 L.S., Trittschuh, E.H., van der Kouwe, A., Varjabedian, A., Wald, L.L., Wu, O., Yendiki, A.,  
331 Young, L., Zollei, L., Fischl, B., Crane, P.K. and Dams-O'Connor, K. (2018). Multimodal  
332 Characterization of the Late Effects of Traumatic Brain Injury: A Methodological Overview of  
333 the Late Effects of Traumatic Brain Injury Project. *J Neurotrauma* 35, 1604-1619.
- 334 13. O'Neil, M.E., Carlson, K., Storzbach, D., Brenner, L., Freeman, M., Quinones, A.,



- 335 Motu'apuaka, M., Ensley, M. and Kansagara, D. (2013). In: *Complications of Mild Traumatic*  
336 *Brain Injury in Veterans and Military Personnel: A Systematic Review*: Washington (DC).
- 337 14. van der Kouwe, A.J.W., Benner, T., Salat, D.H. and Fischl, B. (2008). Brain morphometry  
338 with multiecho MPRAGE. *Neuroimage* 40, 559-569.
- 339 15. Haacke, E.M., Duhaime, A.C., Gean, A.D., Riedy, G., Wintermark, M., Mukherjee, P., Brody,  
340 D.L., DeGraba, T., Duncan, T.D., Elovic, E., Hurley, R., Latour, L., Smirniotopoulos, J.G. and  
341 Smith, D.H. (2010). Common data elements in radiologic imaging of traumatic brain injury. *J*  
342 *Magn Reson Imaging* 32, 516-543.
- 343 16. Fischl, B., Sereno, M.I., Tootell, R.B. and Dale, A.M. (1999). High-resolution intersubject  
344 averaging and a coordinate system for the cortical surface. *Hum Brain Mapp* 8, 272-284.
- 345 17. Kothari, R.U., Brott, T., Broderick, J.P., Barsan, W.G., Sauerbeck, L.R., Zuccarello, M. and  
346 Khoury, J. (1996). The ABCs of measuring intracerebral hemorrhage volumes. *Stroke* 27, 1304-  
347 1305.
- 348 18. Adams, J.H., Doyle, D., Graham, D.I., Lawrence, A.E., McLellan, D.R., Gennarelli, T.A.,  
349 Pastuszko, M. and Sakamoto, T. (1985). The contusion index: a reappraisal in human and  
350 experimental non-missile head injury. *Neuropathol Appl Neurobiol* 11, 299-308.
- 351 19. Courville, C.B. (1942). COUP-CONTRECOUP MECHANISM OF CRANIOCEREBRAL  
352 INJURIES: Some Observations. *Arch Surg* 45, 19-43.
- 353 20. Gentry, L.R., Godersky, J.C. and Thompson, B. (1988). MR imaging of head trauma: review  
354 of the distribution and radiopathologic features of traumatic lesions. *AJR Am J Roentgenol* 150,  
355 663-672.
- 356 21. Yue, J.K., Vassar, M.J., Lingsma, H.F., Cooper, S.R., Okonkwo, D.O., Valadka, A.B.,  
17

- 357 Gordon, W.A., Maas, A.I., Mukherjee, P., Yuh, E.L., Puccio, A.M., Schnyer, D.M., Manley, G.T.  
358 and TRACK-TBI Investigators. (2013). Transforming research and clinical knowledge in  
359 traumatic brain injury pilot: multicenter implementation of the common data elements for  
360 traumatic brain injury. *J Neurotrauma* 30, 1831-1844.
- 361 22. Steyerberg, E.W., Wieggers, E., Sewalt, C., Buki, A., Citerio, G., De Keyser, V., Ercole, A.,  
362 Kunzmann, K., Lanyon, L., Lecky, F., Lingsma, H., Manley, G., Nelson, D., Peul, W., Stocchetti,  
363 N., von Steinbuchel, N., Vande Vyvere, T., Verheyden, J., Wilson, L., Maas, A.I.R., Menon, D.K.,  
364 Participants, C.-T. and Investigators (2019). Case-mix, care pathways, and outcomes in patients  
365 with traumatic brain injury in CENTER-TBI: a European prospective, multicentre, longitudinal,  
366 cohort study. *Lancet Neurol* 18, 923-934.
- 367 23. Smith, D.H., Hicks, R. and Povlishock, J.T. (2013). Therapy development for diffuse axonal  
368 injury. *J Neurotrauma* 30, 307-323.
- 369 24. Irimia, A., Chambers, M.C., Alger, J.R., Filippou, M., Prastawa, M.W., Wang, B., Hovda,  
370 D.A., Gerig, G., Toga, A.W., Kikinis, R., Vespa, P.M. and Van Horn, J.D. (2011). Comparison of  
371 acute and chronic traumatic brain injury using semi-automatic multimodal segmentation of MR  
372 volumes. *J Neurotrauma* 28, 2287-2306.

## 373 **Figure Legends**

### 374 **Figure 1. Overview of Lesion Correction Method**

375 Row 1: Axial, coronal, and sagittal T1-weighted images of a representative patient with traumatic  
376 brain injury. FreeSurfer reconstructions of the cortical surface (blue line) and grey-white surface  
377 (yellow line) are used to visually identify regions where a cortical lesion (red arrows) caused  
378 surface inaccuracies. Row 2: We manually outlined lesions by labeling inaccurate vertices on the  
379 cortical surface (left image). This surface inaccuracy (labeled in red) is shown in the coronal  
380 plane in the middle image and the right, zoomed image. The red label passes through lesioned,  
381 encephalomalacic tissue. Row 3: To correct for the inaccuracy in the surface label at the site of  
382 the lesion, we remove the volume of cortex within the lesion label and perform cortical  
383 volumetric measures that exclude the lesioned tissue.

384

### 385 **Figure 2. Lesion Topology and Network-based Lesion Effects on Cortical Volume**

386 In the left panel, we show a heat map of cortical lesions for all 46 patients who had at least one  
387 lesion. The anatomic regions most commonly affected by cortical lesions were the frontal and  
388 temporal lobes, particularly the frontal poles, temporal poles and orbitofrontal regions. In the top  
389 right panel, we show the 7 functional networks from the Yeo atlas<sup>11</sup> that were used to investigate  
390 network-specific lesion effects. In the bottom right panel, we show a violin plot demonstrating  
391 the changes in average cortical volume for each network after applying the lesion correction  
392 method. Lesion effects on average cortical volume varied between networks, with the limbic  
393 network showing the largest magnitude of decline in average cortical volume after application of  
394 the lesion correction method.

FreeSurfer  
Reconstruction

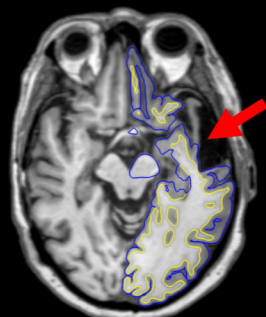

Axial

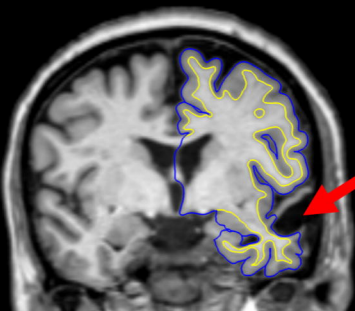

Coronal

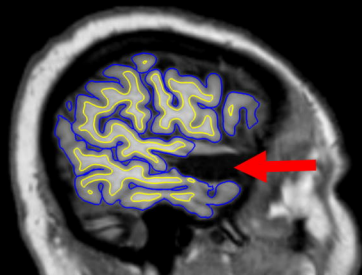

Sagittal

Lesion  
Labeling

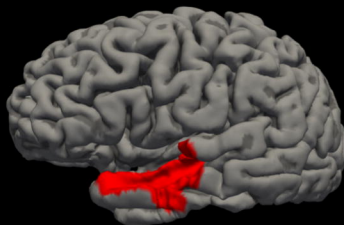

Lesion Label on 3D Surface

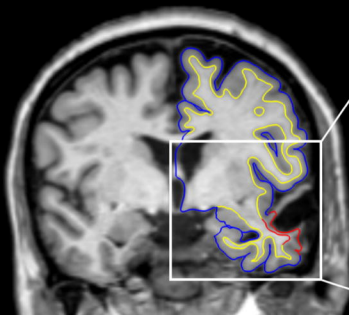

Lesion Label on Surface in Coronal Plane

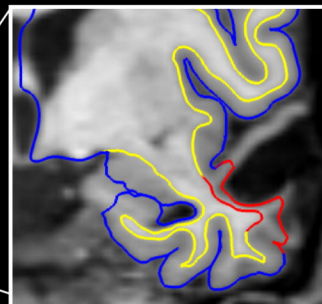

Cortical  
Volume  
Correction

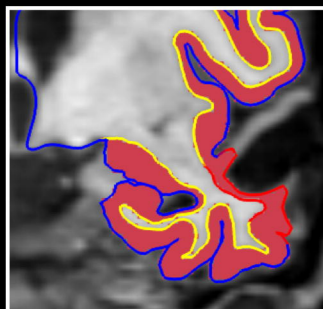

Inaccurate Cortical Ribbon

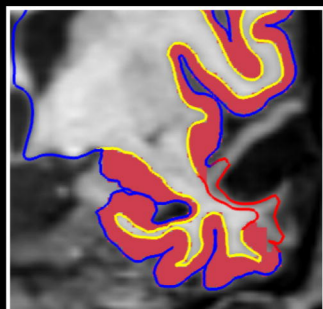

Corrected Cortical Ribbon

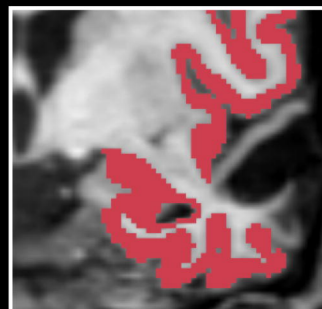

Cortical Volume

# Contusions

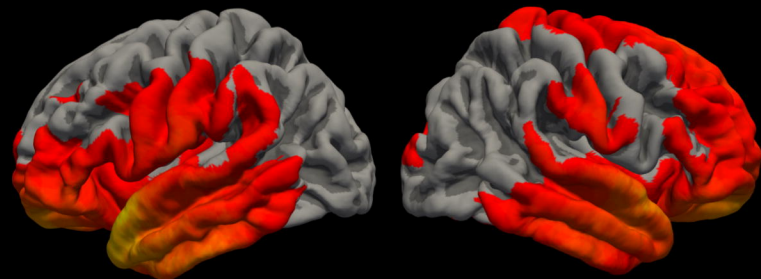

Left Lateral

Right Lateral

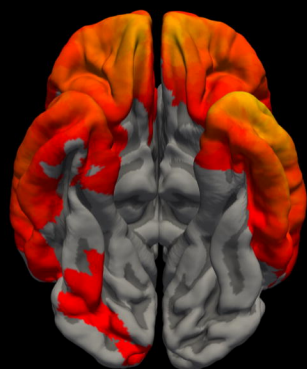

Inferior

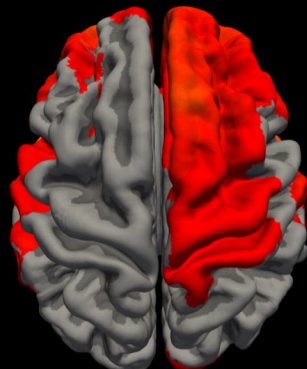

Superior

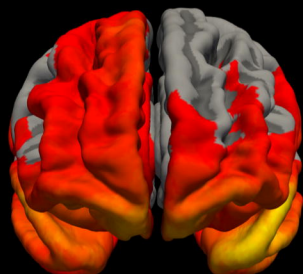

Anterior

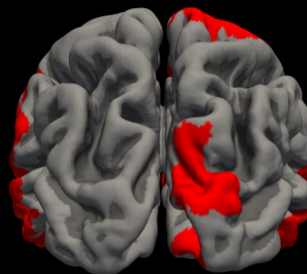

Posterior

n=1  n=20

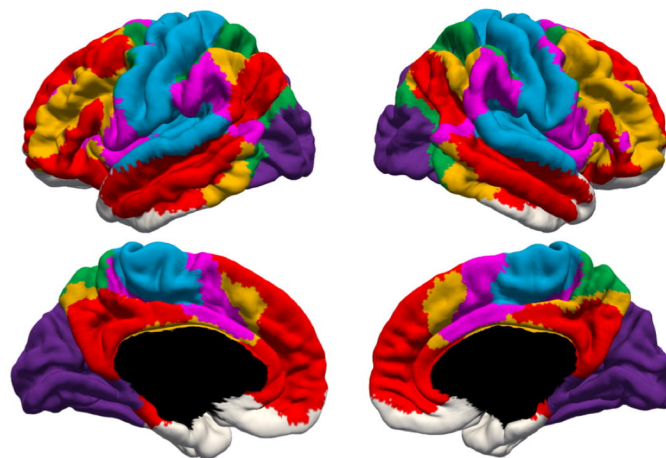

## Networks

-  Default Mode
-  Salience
-  Limbic
-  Executive Control
-  Dorsal Attention
-  Somatomotor
-  Visual

## Contusion Effects on Network Volume

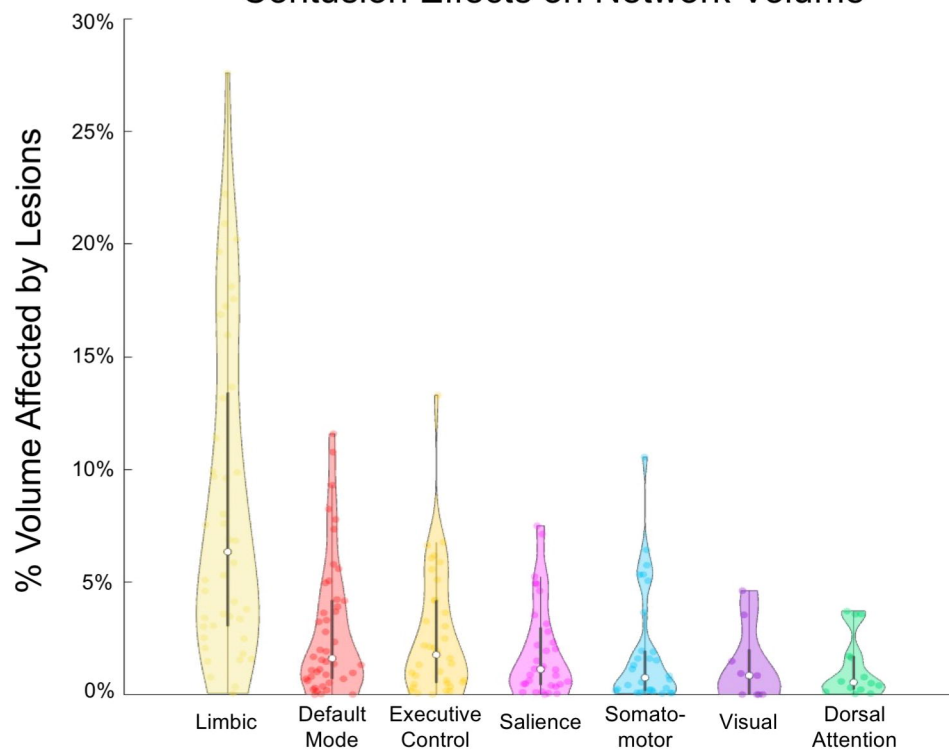

Source: https://www.biorxiv.org/content/10.1101/822148v1.full.pdf
